# Supplementary material for: The Patterns of Non-vitamin K Antagonist Oral Anticoagulants (NOACs) Use in Patients with Atrial Fibrillation in Seven Balkan Countries: a Report from the BALKAN-AF Survey
Source: Springer Nature journal article supplement (doi:10.1007/s12325-017-0589-5), 2017-08-01
Supplement: MOESM2 [file 13448662]

## The BALKAN-AF Investigators List

### ROMANIA:

1. **Gheorghe-Andrei Dan**, Medicine University "Carol Davila", Colentina University Hospital, Bucharest,
2. Rodica Musetescu, Cardiology Centre – County Emergency Hospital, Craiova,
3. Mircea Ioachim Popescu, Cardiology department, Emergency Hospital, Oradea,
4. Elisabeta Badila, Emergency Clinical Hospital, Internal Medicine Department, Bucharest,
5. Catalina Arsenescu Georgescu, Institute for Cardiovascular Diseases 'Prof Dr George I.M. Georgescu', Iasi
6. Sorina Pop, General Practice in Cluj-Napoca, Cluj-Napoca,
7. Raluca Popescu, Colentina University Hospital, Cardiology Department, Bucharest,
8. Simina Neamtu, General Practice in Timisoara, Timisoara,
9. Floriana Oancea, Cardiology Department, County Emergency Hospital, Sibiu, Anca Breha, Medicine University "Carol Davila", Colentina University Hospital, Bucharest,
10. Anca Rodica Dan, Medicine University "Carol Davila", Colentina University Hospital, Bucharest

### SERBIA:

1. **Tatjana Potpara**, Cardiology Clinic, University Clinical Center of Serbia, Belgrade University Faculty of Medicine, Belgrade,
2. Marija Polovina, Cardiology Clinic, University Clinical Center of Serbia, Belgrade University Faculty of Medicine, Belgrade,
3. Srdjan Milanov, Cardiology Clinic, University Clinical Center of Kragujevac, Kragujevac,
4. Gorana Mitic, Hematology Clinic, University Clinical Center of Vojvodina, University of Novi Sad, Medical Faculty, Novi Sad,
5. Marko Milanov, University Clinical Center Zvezdara, Cardiology Department, Belgrade,
6. Jelena Savic, Hematology Clinic, University Clinical Center of Vojvodina, Novi Sad,
7. Snezana Markovic, General Hospital, Pirot,
8. Ivana Koncarevic, University Clinical Center Bezanijska kosa, Cardiology Department, Belgrade,
9. Jelena Gavrilovic, University Clinical Center Bezanijska kosa, Cardiology Department, Belgrade,
10. Marija Pavlovic, Cardiology Clinic, University Clinical Center of Kragujevac, Kragujevac,
11. Dijana Djikic, General Hospital Gracanica, Gracanica,
12. Marijana Petrovic, Cardiology Clinic, University Clinical Center of Kragujevac, Kragujevac,
13. Stefan Simovic, Cardiology Clinic, University Clinical Center of Kragujevac, Kragujevac,
14. Semir Malic, General Hospital Gracanica, Gracanica,
15. Jusuf Hodzic, General Hospital Gracanica, Gracanica,
16. Milovan Stojanovic, Clinic for Cardiovascular Diseases, Institute Niska Banja, Niska Banja,
17. Sanja Gnip, Hematology Clinic, University Clinical Center of Vojvodina, Novi Sad,
18. Milan Zlatar, Emergency Center, Coronary Care Unit, University Clinical Center of Serbia,
19. Dragan Matic, Emergency Center, Coronary Care Unit, University Clinical Center of Serbia, Belgrade,

20. Snezana Lazic, Internal Medicine Clinic, University Clinical Center of Pristina, Pristina,
21. Tijana Acimovic, University Clinical Center Bezanijska kosa, Cardiology Department, Belgrade,
22. Pavica Radovic, Hematology Clinic, University Clinical Center of Vojvodina, Novi Sad,
23. Vladan Peric, Internal Medicine Clinic, University Clinical Center of Pristina, Pristina,
24. Sanja Markovic, Internal Medicine Clinic, University Clinical Center of Pristina, Pristina,
25. Snezana Kovacevic, General Hospital Sabac, Sabac,
26. Aleksandra Arandjelovic, University Clinical Center Zvezdara, Cardiology Department, University of Belgrade, Faculty of Medicine, Belgrade,
27. Milika Asanin, Emergency Center, Coronary Care Unit, Clinical Center of Serbia, Belgrade University of Belgrade, Faculty of Medicine, Belgrade,
28. Milan M Nedeljkovic, Cardiology Clinic, University Clinical Center of Serbia, Belgrade University Faculty of Medicine, Belgrade
29. Marija Zdravkovic, University Clinical Center Bezanijska kosa, Cardiology Department, University of Belgrade, Faculty of Medicine, Belgrade,
30. Marina Deljanin Ilic, Clinic for Cardiovascular Diseases, Institute Niska Banja, Niska Banja,

#### **BULGARIA:**

1. **Elina Trendafilova** , National Heart Hospital, Coronary Care Unit, Sofia,
2. Elena Dimitrova, National Heart Hospital, Coronary Care Unit, Sofia,
3. Stanislav Petranov , Health Center, Bugras, Bugras,
4. Delyana Kamenova, Health Center Vidin, Vidin,
5. Penka Kamenova, District Hospital/MHAT, Ruse,
6. Svetoslava Elefterova, University Hospital, Varna,
7. Valentin Shterev, Health Center, Varna,
8. Maria Zekova, University Hospital, Pleven,
9. Stela Diukiandzhieva, Health Center Gorna Oryahovitza, Gorna Oryahovitza,
10. Evgenii Goshev, National Heart Hospital, Coronary Care Unit, Sofia,
11. Boiko Dimitrov, Community Hospital, Montana,
12. Tihomir Sotirov, Community Hospital, Haskovo,
13. Valentina Simeonova, Health Center, Sofia,
14. Anna Velichkova, National Heart Hospital, Coronary Care Unit, Sofia,
15. Dimitrina Drianovska, Health Center, Sofia,
16. Liliya Ivanova Vasileva Boiadzhieva, MBAL Dr Stefan Cherkezov AD/ Second Internal Department, Veliko Trnovo,
17. Darina Buchukova, University of Medicine, Sofia,

#### **ALBANIA:**

1. **Artan Goda**, Clinic of Cardiology, University Hospital Center Mother Theresa, Tirana,
2. Vilma Paparisto, Clinic of Cardiology, University Hospital Center Mother Theresa, Tirana,
3. Viktor Gjini, Regional Hospital Fier,
4. Uliks Ekmekciu, Clinic of Internal Medicine, University Hospital Center Mother Theresa, Tirana,

5. Hortensia Gjergo, Clinic of Cardiology, University Hospital Center Mother Theresa, Tirana,
6. Alma Mijo, Clinic of Cardiology, University Hospital Center Mother Theresa, Tirana,
7. Ervina Shirka, Clinic of Cardiology, University Hospital Center Mother Theresa, Tirana,
8. Ina Refatllari, Clinic of Internal Medicine, University Hospital Center Mother Theresa, Tirana,

#### **BOSNIA AND HERZEGOVINA:**

1. **Zumreta Kusljagic**, Clinic of Internal Medicine, Cardiology Department, University Clinical Center Tuzla, Medical Faculty, Tuzla,
2. Daniela Loncar, Clinic of Internal Medicine, Department of Intensive Care and Therapy, University Clinical Center Tuzla, Tuzla,
3. Belma Pojskic, General Hospital, Zenica,
4. Denis Mrsic, Clinic of Internal Medicine, Department of Intensive Care and Therapy, University Clinical Center Tuzla, Tuzla,
5. Alma Sijamija, General Hospital, Travnik,
6. Amira Bijedic, Clinic of Internal Medicine, Cardiology Department, University Clinical Center Tuzla, Tuzla,
7. Irma Bijedic, Clinic of Internal Medicine, University Clinical Center Tuzla, Tuzla,
8. Indira Karamujic, Clinic of Internal Medicine, Cardiology Department, University Clinical Center Tuzla, Tuzla,
9. Sanela Halilovic, General Hospital Travnik,
10. Hazim Tulumovic, Clinic of Internal Medicine, Department of Intensive Care and Therapy, University Clinical Center Tuzla, Tuzla
11. Sekib Sokolovic, Clinic of Heart and Rheumatologic Diseases, University Clinical Center Sarajevo, Sarajevo

#### **CROATIA:**

1. **Sime Manola**, Clinical Center „Sestre Milosrdnice“, Zagreb,
2. Sandro Brusich, Clinical Center Rijeka, Rijeka,
3. Ivan Zeljkovic, Clinical Center „Sestre Milosrdnice“, Zagreb
4. Ante Anic, General Hospital, Zadar,
5. Nikola Pavlovic, Clinical Center „Sestre Milosrdnice“, Zagreb
6. Vjekoslav Radeljic, Clinical Center „Sestre Milosrdnice“, Zagreb
7. Melita Jeric, General Hospital Varazdin, Varazdin,
8. Petar Pekic, Clinical Hospital „Sveti Duh“, Zagreb,
9. Kresimir Milas, General Hospital, Pula,

#### **MONTENEGRO:**

1. **Ljilja Music**, Cardiology Clinic, University Clinical Center of Montenegro, University of Podgorica, Medical Faculty, Podgorica,
2. Ana Nenezic, Cardiology Clinic, University Clinical Center of Montenegro, Podgorica

3. Nebojsa Bulatovic, Cardiology Clinic, University Clinical Center of Montenegro, University of Podgorica, Medical Faculty, Podgorica
4. Dijana Asanovic, Cardiology Clinic, University Clinical Center of Montenegro, Podgorica
